# Supplementary material for: Characterisation of dissolved organic matter to optimise powdered activated carbon and clarification removal efficiency
Source: Royal Society of Chemistry journal article supplement (doi:10.1039/d0ew00149j), 2020-01-01
Supplement: d0ew00149j1.pdf [file d0ew00149j1.pdf]

1 **Characterisation of dissolved organic matter to optimise**  
2 **powdered activated carbon and clarification removal**  
3 **efficiency**

4 Shutova Y.<sup>1</sup>, Rao N.R.H.<sup>1</sup>, Zamyadi A.<sup>2</sup>, Baker A.<sup>3</sup>, Bridgeman J.<sup>4</sup>, Lau B.<sup>1</sup>, Henderson  
5 R.K.<sup>1,\*</sup>

6 <sup>1</sup> *School of Chemical Engineering, UNSW Sydney, Australia*

7 <sup>2</sup> *Water Research Centre, School of Civil and Environmental Engineering UNSW Sydney,*  
8 *Australia*

9 <sup>3</sup> *Connected Waters Initiative Research Centre, UNSW, Sydney, Australia*

10 <sup>4</sup> *Faculty of Engineering and Informatics, University of Bradford, Bradford, United Kingdom*

11 \* Corresponding author – [r.henderson@unsw.edu.au](mailto:r.henderson@unsw.edu.au)

12

13

14 **Supporting information**

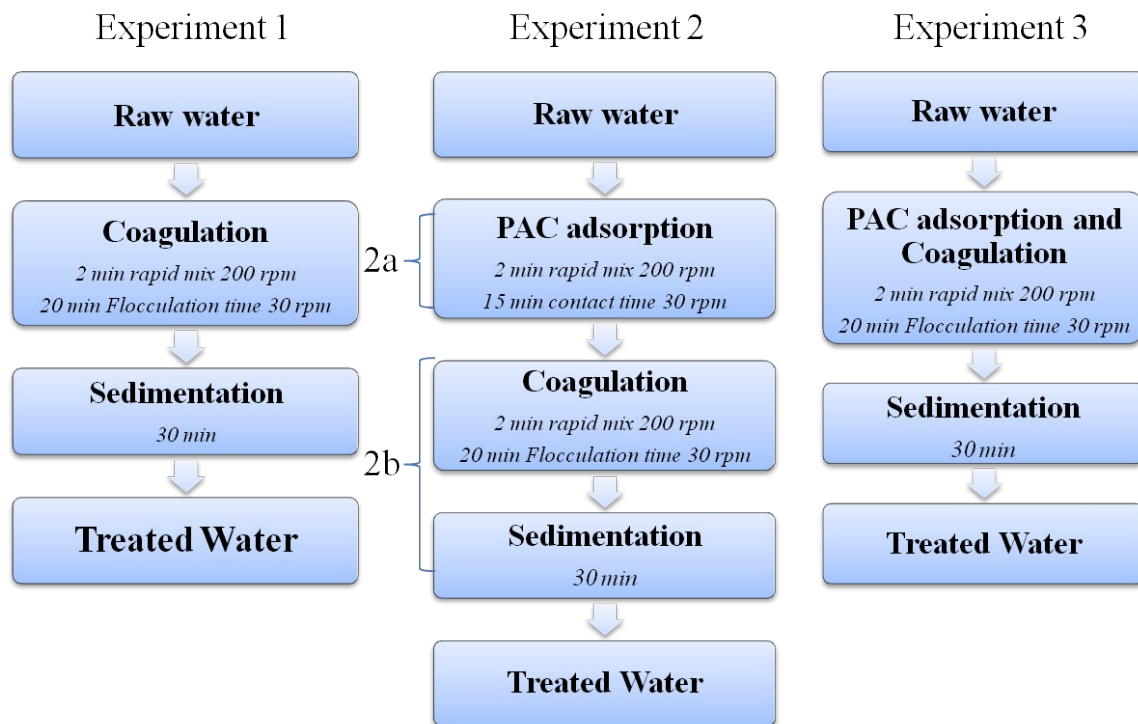

Figure S1 Jar tests experiment flow chart. Experiment 1 included coagulation/ sedimentation; Experiment 2 included two sub-experiments PAC absorption (2a) followed by coagulation/sedimentation (2b); Experiment 3 combined PAC absorption and coagulation/sedimentation processes

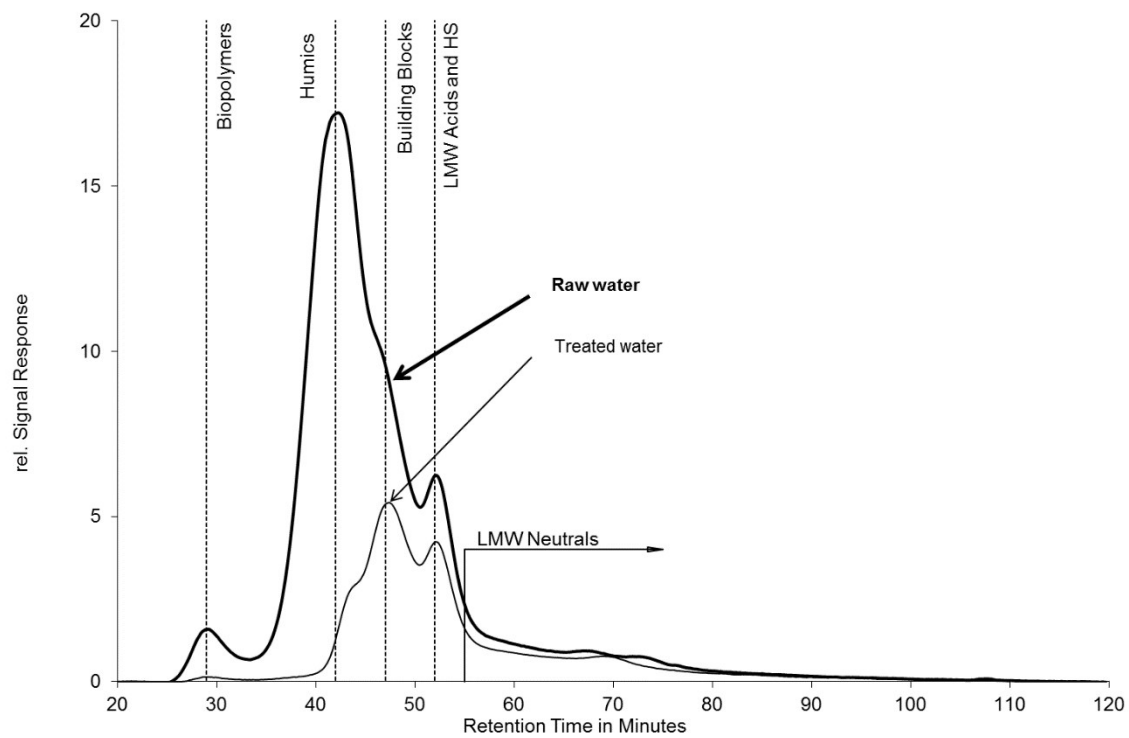

21

22 *Figure S2 Example of LC-OCD chromatogram of DOC signal of LHD raw and treated water*  
 23 *(Experiment 1, 16 mgAl/L)*

24

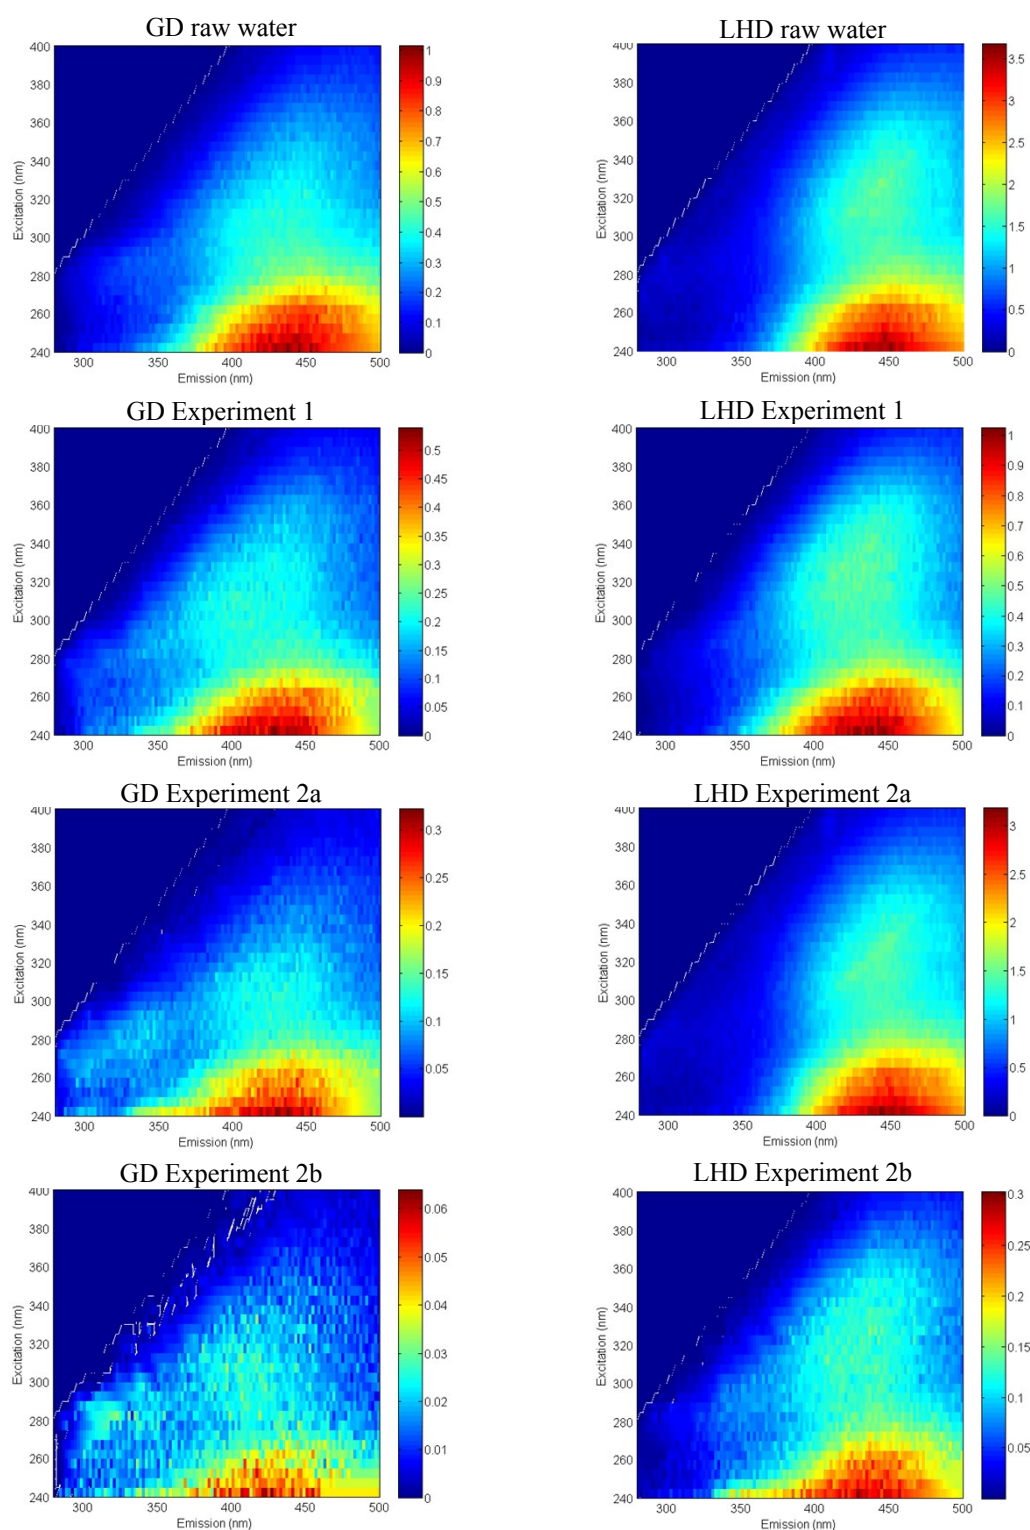

25

26 *Figure S3 Examples of EEM in raw water and treated water samples at the optimum doses in*  
 27 *Experiments 1&2*

28

29

30

a) DOC adsorption GD experiments

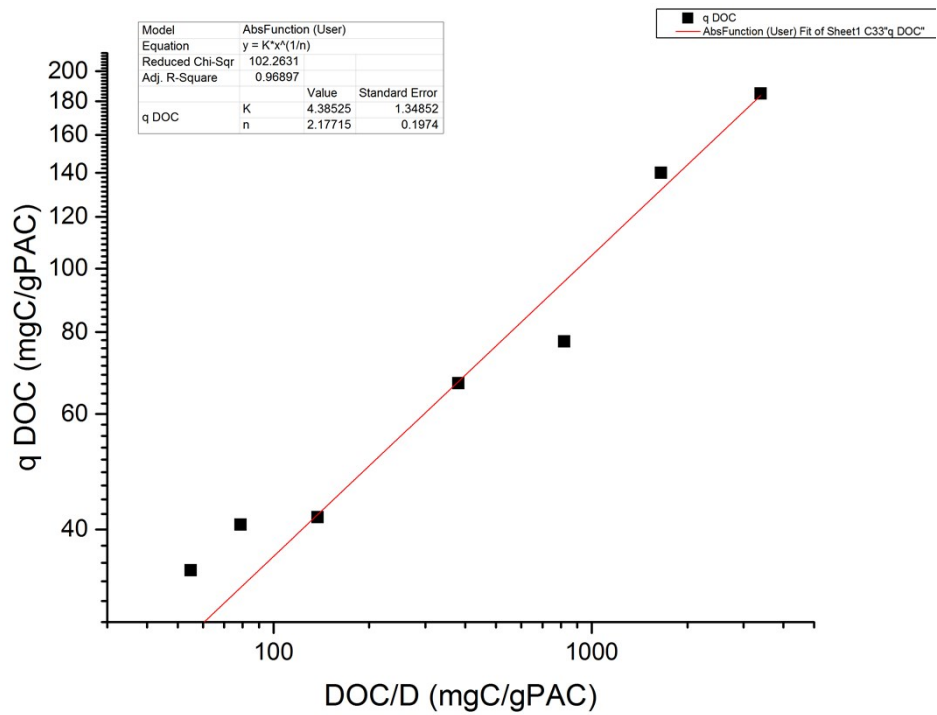

31

32

b) DOC adsorption LHD experiments

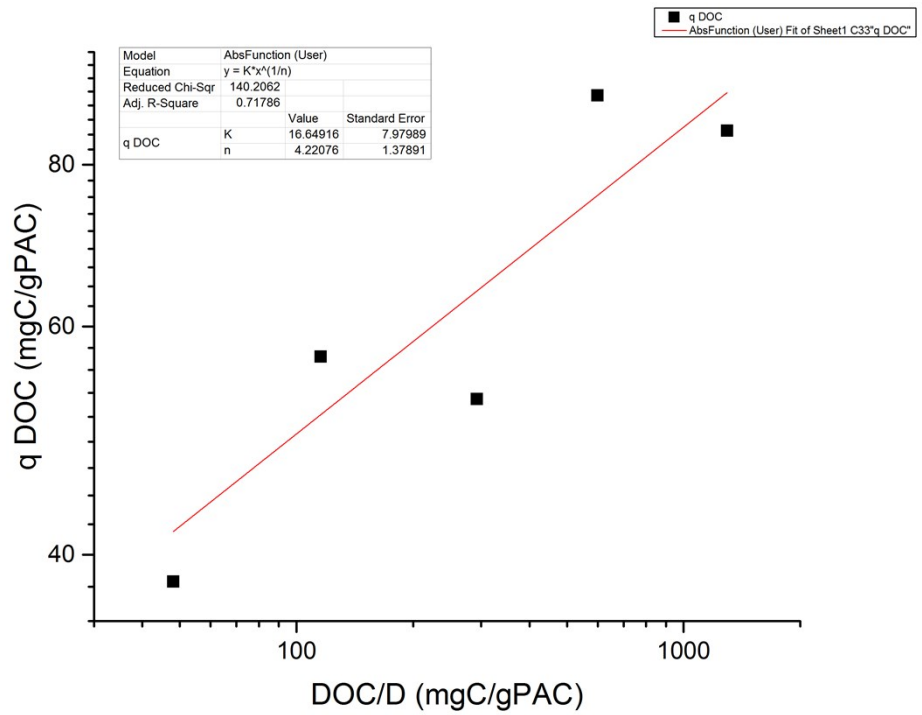

33

34

35

c) DOC fractions adsorption GD experiments

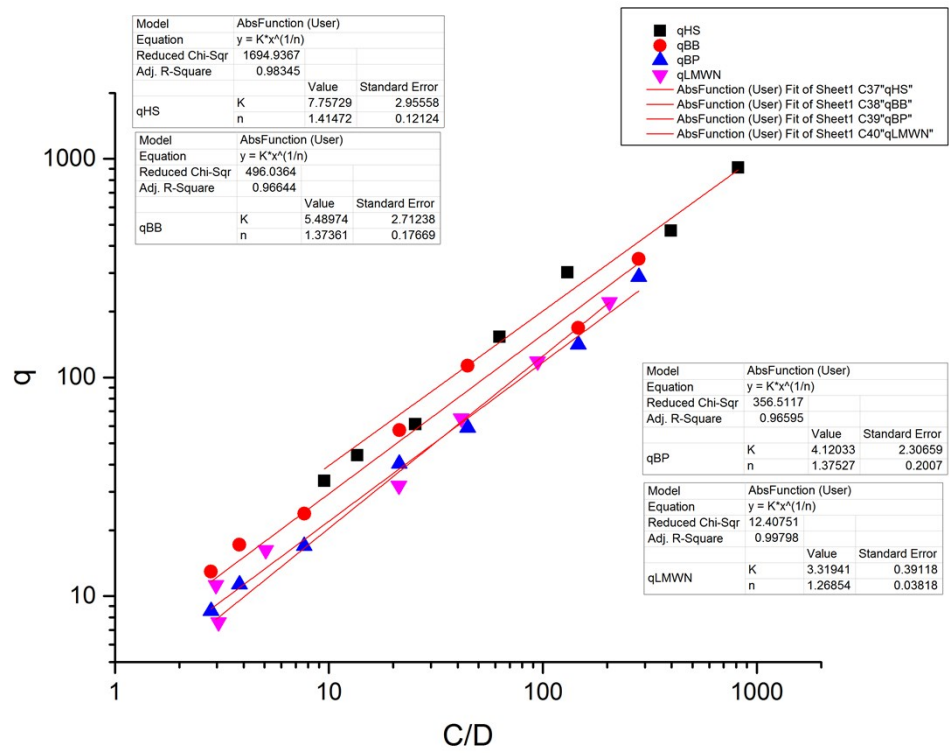

36

37

d) DOC fractions adsorption LHD experiments

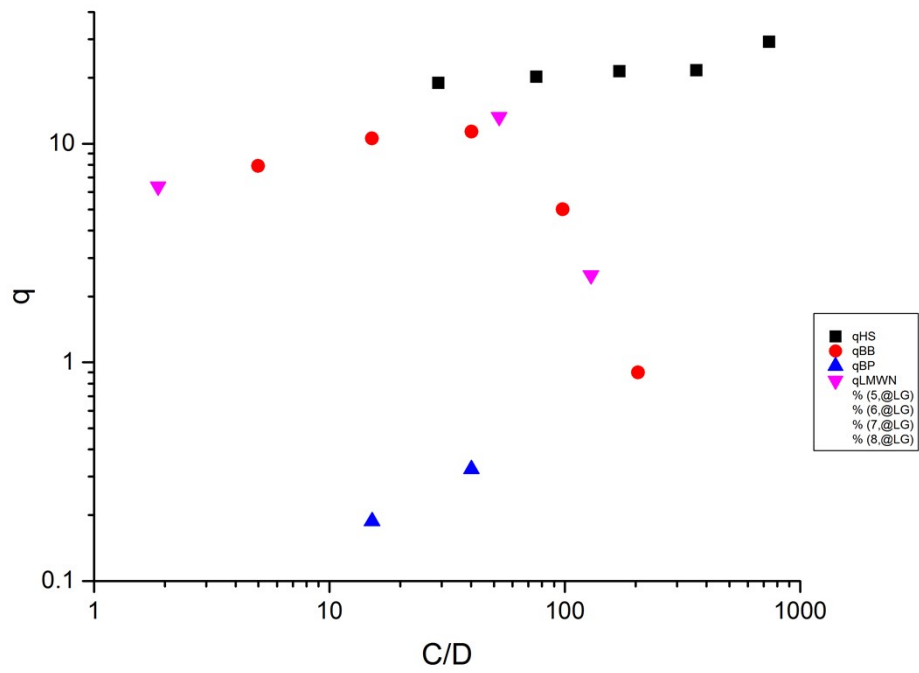

38

39

40

e) Fluorescence components adsorption GD experiments

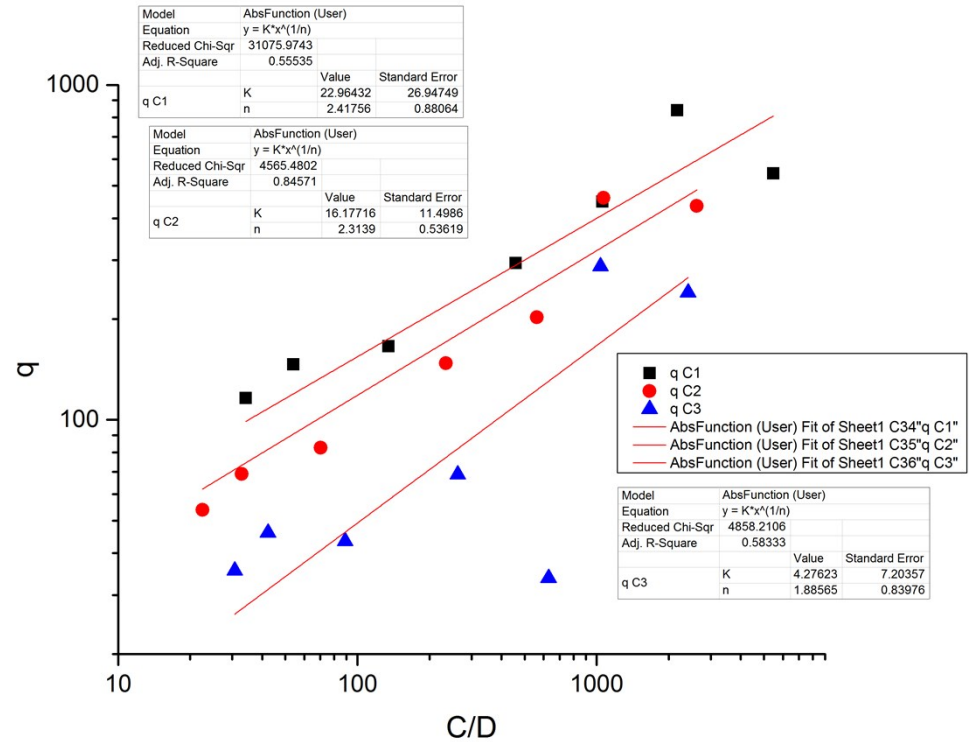

41

42

43

f) Fluorescence components adsorption LHD experiments

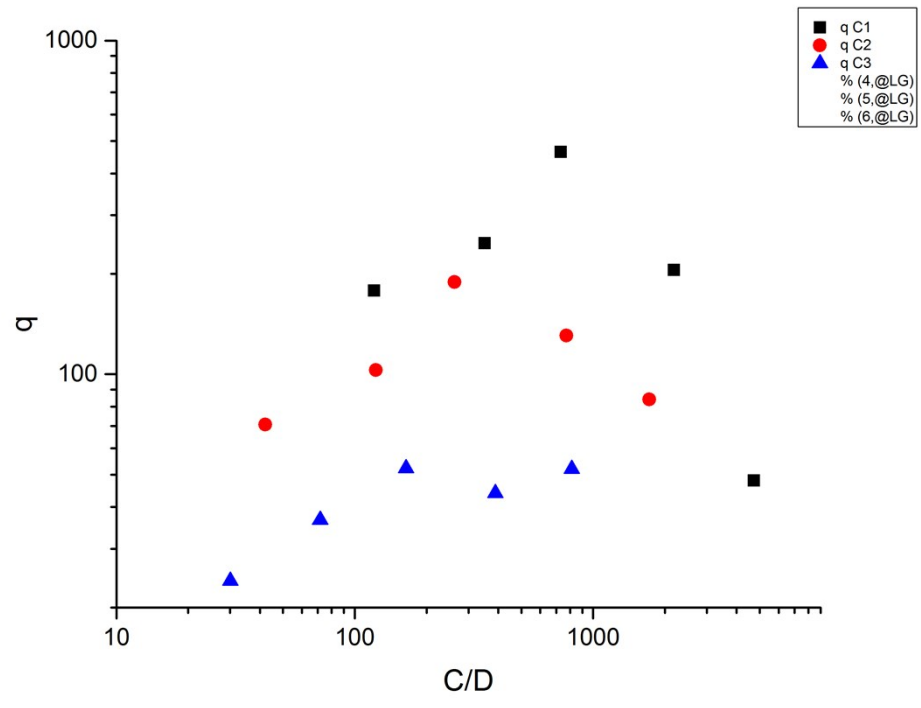

44

45 Figure S4 Modified Freundlich isotherm fitting for adsorption of OM fractions in GD and

46 LHD Experiments 2a

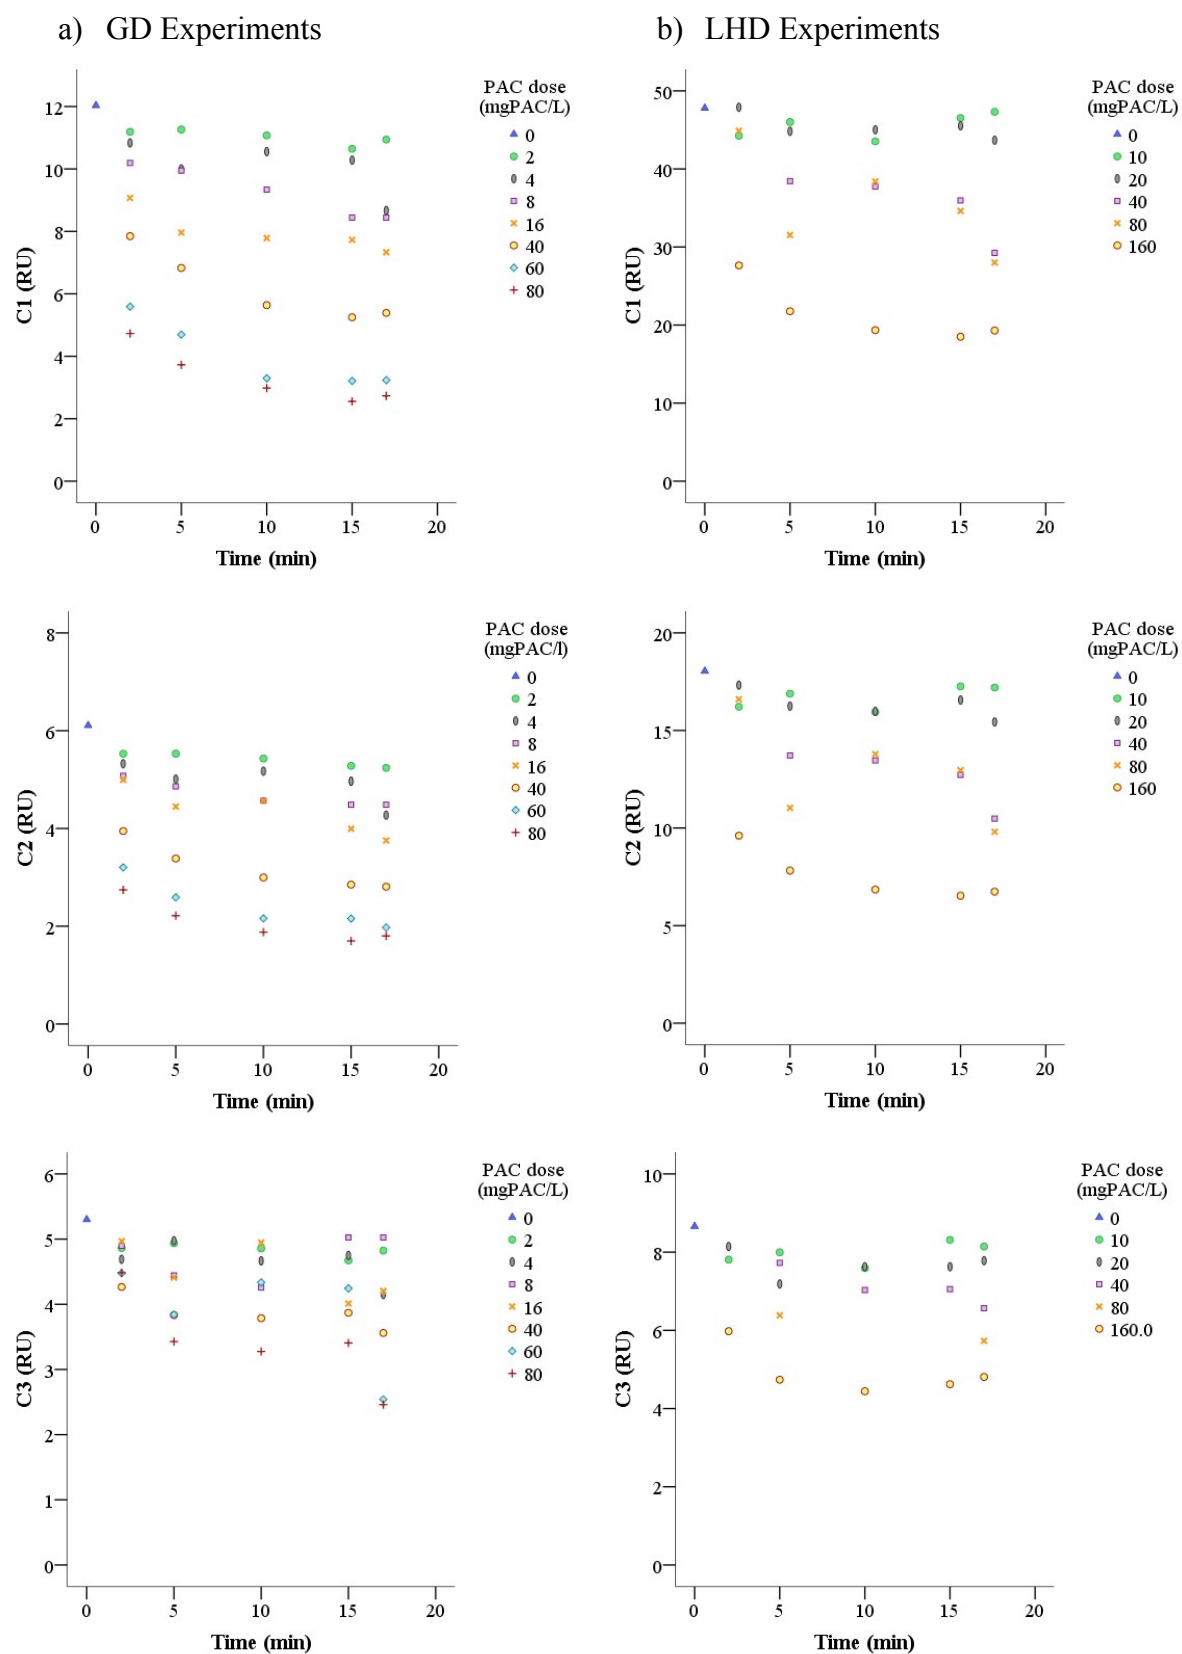

47 Figure S5 Fluorescence components C1, C2, C3 changes during the Experiments 2a



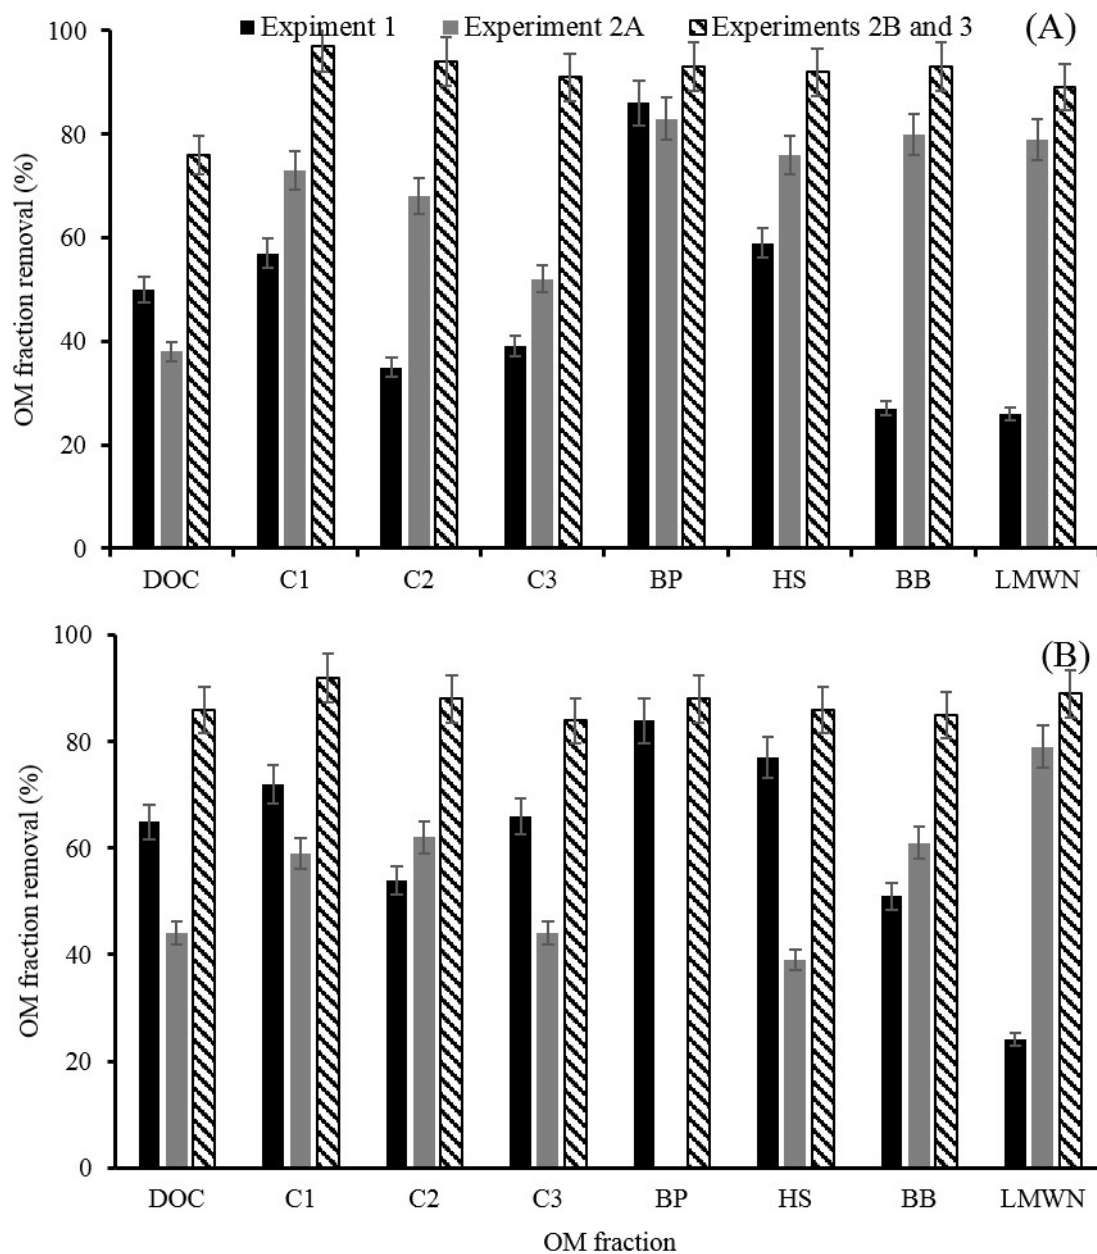

Figure S6. Removal of OM fractions at the optimum doses of the coagulant and PAC in (A) GD and (B) LHD waters via Experiment 1, Experiment 2A and, Experiments 2B and 3.
